# Supplementary material for: The Antecedents and Consequences of Health Care Professional–Patient Online Interactions: Systematic Review
Source: PubMed Central journal article supplement (PMC6785718; doi:10.2196/13940), 2019-09-25
Supplement: jmir_v21i9e13940_app3.pdf [file jmir_v21i9e13940_app3.pdf]

**Multimedia Appendix 3. Quality assessment of included studies.**

**Part 1. Quality assessment for qualitative and mixed-methods studies(n=14)<sup>a</sup>**

| The Quality Assessment Tool                                                                           |  |  |  |  |  |  |  |  |  |  |  |  |
|-------------------------------------------------------------------------------------------------------|--|--|--|--|--|--|--|--|--|--|--|--|
| (1) Was there a clear statement of the aims of the research?                                          |  |  |  |  |  |  |  |  |  |  |  |  |
| (2) Is a qualitative methodology appropriate?                                                         |  |  |  |  |  |  |  |  |  |  |  |  |
| (3) Was the research design appropriate to address the aims of the research?                          |  |  |  |  |  |  |  |  |  |  |  |  |
| (4) Was the recruitment strategy appropriate to the aims of the research?                             |  |  |  |  |  |  |  |  |  |  |  |  |
| (5) Was the data collected in a way that addressed the research issue?                                |  |  |  |  |  |  |  |  |  |  |  |  |
| (6) Has the relationship between researcher and participants been adequately considered?              |  |  |  |  |  |  |  |  |  |  |  |  |
| (7) Have ethical issues been taken into consideration?                                                |  |  |  |  |  |  |  |  |  |  |  |  |
| (8) Was the data analysis sufficiently rigorous?                                                      |  |  |  |  |  |  |  |  |  |  |  |  |
| (9) Is there a clear statement of findings?                                                           |  |  |  |  |  |  |  |  |  |  |  |  |
| (10) Did the researcher discuss the contribution of the study to existing knowledge or understanding? |  |  |  |  |  |  |  |  |  |  |  |  |

| ID  | First author              | (1) | (2) | (3) | (4) | (5) | (6) | (7) | (8) | (9) | (10) | Qualified or not? |
|-----|---------------------------|-----|-----|-----|-----|-----|-----|-----|-----|-----|------|-------------------|
| A02 | Umefjord et al. [9]       | 1   | 1   | 1   | 1   | 1   | 0   | 1   | 1   | 1   | 1    | Yes               |
| A07 | Hewitt-Taylor et al. [28] | 1   | 1   | 1   | 1   | 1   | 0   | 1   | 1   | 1   | 1    | Yes               |
| A08 | Dizon et al. [23]         | 1   | 2   | 2   | 2   | 2   | 2   | 2   | 2   | 0   | 0    | No                |
| A09 | Farnan et                 | 1   | 1   | 1   | 2   | 2   | 2   | 2   | 2   | 1   | 1    | No                |

|     |                       |   |   |   |   |   |   |   |   |   |   |     |
|-----|-----------------------|---|---|---|---|---|---|---|---|---|---|-----|
|     | al. [2]               |   |   |   |   |   |   |   |   |   |   |     |
| A12 | George et al. [24]    | 1 | 2 | 2 | 2 | 2 | 2 | 2 | 2 | 1 | 1 | No  |
| A14 | Schook et al.[30]     | 1 | 1 | 1 | 1 | 1 | 1 | 1 | 1 | 1 | 1 | Yes |
| A17 | Ventola [25]          | 1 | 2 | 2 | 2 | 2 | 2 | 2 | 2 | 1 | 1 | No  |
| A18 | Haluzá et al.[34]     | 1 | 1 | 1 | 1 | 1 | 0 | 0 | 1 | 1 | 1 | Yes |
| A20 | Haluzá et al. [35]    | 1 | 1 | 1 | 1 | 1 | 0 | 1 | 1 | 1 | 1 | Yes |
| A21 | Zummo [39]            | 1 | 1 | 1 | 1 | 1 | 1 | 1 | 1 | 1 | 1 | Yes |
| A22 | Guo et al. [4]        | 1 | 2 | 2 | 2 | 2 | 2 | 2 | 2 | 1 | 1 | No  |
| A24 | Björk et al. [26]     | 1 | 1 | 1 | 1 | 1 | 0 | 1 | 1 | 1 | 1 | Yes |
| A25 | Atanasova et al. [36] | 1 | 1 | 1 | 1 | 1 | 0 | 1 | 1 | 1 | 1 | Yes |
| A32 | Atanasova et al. [27] | 1 | 1 | 1 | 1 | 1 | 0 | 1 | 1 | 1 | 1 | Yes |

a: Yes = 1, No = 0, Can't tell = 2.

The total score is calculated as the proportion of "yes". If the score is less than 0.7, it is considered unqualified.

**Part 2. Quality assessment for quantitative studies(n=15)<sup>a</sup>**

The Quality Assessment Tool

***Objectives***

(1) Was the research question or objective in this paper clearly stated?

(2) Was the study population clearly specified and defined?

***Sample selection and method***

(3) Was the participation rate of eligible persons at least 50%?

(4) Sampling method: Was it representative of the population intended in the study?

(5) Was a sample size justification, power description, or variance and effect estimates provided?

(6) Was the study design appropriate for the research question?

(7) Was it a primary or secondary data source?[yes = primary, no = secondary]

(8) Does the study test a stated hypothesis?

***Design and Results***

(9) Were the independent variables clearly defined, valid, reliable, and implemented consistently across all study participants?

(10) Were the outcome measures (dependent variables) clearly defined, valid, reliable, and implemented consistently across all study participants?

(11) Were the statistical analyses performed correctly?

(12) Do the data justify the conclusions?

***Outcomes of the research***

(13) Did the researcher discuss the contribution of the study to existing knowledge or understanding?

(14) Did the researchers confirm that the study filled a gap in a new field?

| ID  | Study                | (1) | (2) | (3) | (4) | (5) | (6) | (7) | (8) | (9) | (10) | (11) | (12) | (13) | (14) | Qualified or not? |
|-----|----------------------|-----|-----|-----|-----|-----|-----|-----|-----|-----|------|------|------|------|------|-------------------|
| A05 | Dixon et al. [29]    | 1   | 1   | 1   | 1   | 1   | 1   | 1   | 2   | 1   | 1    | 1    | 1    | 0    | 0    | Yes               |
| A06 | Lee et al. [31]      | 1   | 1   | 1   | 1   | 1   | 1   | 1   | 1   | 1   | 1    | 1    | 1    | 1    | 1    | Yes               |
| A13 | Brown et al. [46]    | 1   | 1   | 0   | 1   | 1   | 1   | 1   | 2   | 1   | 1    | 1    | 1    | 1    | 1    | Yes               |
| A15 | Campbell et al. [32] | 1   | 1   | 0   | 0   | 1   | 1   | 1   | 2   | 1   | 1    | 1    | 1    | 1    | 1    | Yes               |
| A16 | Liu et al.           | 1   | 1   | 2   | 1   | 1   | 1   | 0   | 1   | 1   | 1    | 1    | 1    | 0    | 1    | Yes               |

|     |                     |   |   |   |   |   |   |   |   |   |   |   |   |   |   |     |
|-----|---------------------|---|---|---|---|---|---|---|---|---|---|---|---|---|---|-----|
|     | [33]                |   |   |   |   |   |   |   |   |   |   |   |   |   |   |     |
| A19 | Yang et al.<br>[44] | 1 | 1 | 2 | 1 | 1 | 1 | 0 | 1 | 1 | 1 | 1 | 1 | 1 | 1 | Yes |
| A23 | Wu et al.<br>[6]    | 1 | 1 | 2 | 1 | 1 | 1 | 0 | 1 | 1 | 1 | 1 | 1 | 1 | 1 | Yes |
| A26 | Zhang et al. [38]   | 1 | 1 | 1 | 1 | 1 | 1 | 1 | 1 | 1 | 1 | 1 | 1 | 1 | 1 | Yes |
| A27 | Petrič et al. [40]  | 1 | 1 | 1 | 1 | 1 | 1 | 1 | 2 | 1 | 1 | 1 | 1 | 1 | 1 | Yes |
| A28 | Guo et al. [3]      | 1 | 1 | 2 | 1 | 1 | 1 | 0 | 1 | 1 | 1 | 1 | 1 | 1 | 1 | Yes |
| A29 | Wu et al. [41]      | 1 | 1 | 1 | 1 | 1 | 1 | 1 | 1 | 1 | 1 | 1 | 1 | 1 | 1 | Yes |
| A30 | Wu et al. [42]      | 1 | 1 | 1 | 1 | 1 | 1 | 1 | 1 | 1 | 1 | 1 | 1 | 1 | 1 | Yes |
| A31 | Daniel et al. [37]  | 1 | 1 | 0 | 0 | 1 | 1 | 1 | 2 | 1 | 1 | 1 | 1 | 1 | 1 | Yes |
| A33 | Wu et al. [45]      | 1 | 1 | 2 | 1 | 1 | 1 | 0 | 1 | 1 | 1 | 1 | 1 | 1 | 1 | Yes |
| A34 | Guo et al. [43]     | 1 | 1 | 2 | 1 | 1 | 1 | 0 | 1 | 1 | 1 | 1 | 1 | 1 | 1 | Yes |

a: Yes = 1, No = 0, Not reported = 2.

The total score is calculated as the proportion of “yes”. If the score is less than 0.7, it is considered unqualified.

### Part 3. Quality assessment for review papers (N=5)<sup>a</sup>

| ID  | First author                   | Peer-reviewed or not? | Qualified or not? |
|-----|--------------------------------|-----------------------|-------------------|
| A01 | Ball et al. [1]                | Yes                   | Yes               |
| A03 | McGeady et al. [15]            | Yes                   | Yes               |
| A04 | Masters [10]                   | Yes                   | Yes               |
| A10 | Courtney [16]                  | No                    | No                |
| A11 | Gholami-Kordkheili et al. [11] | Yes                   | Yes               |

a: Review articles published in peer-reviewed journals were determined to be qualified.
